# Supplementary material
Source: PubMed Central journal article supplement (PMC3929432)
Supplement: bm401533y_si_001.pdf [file bm401533y_si_001.pdf]

SUPPORTING INFORMATION

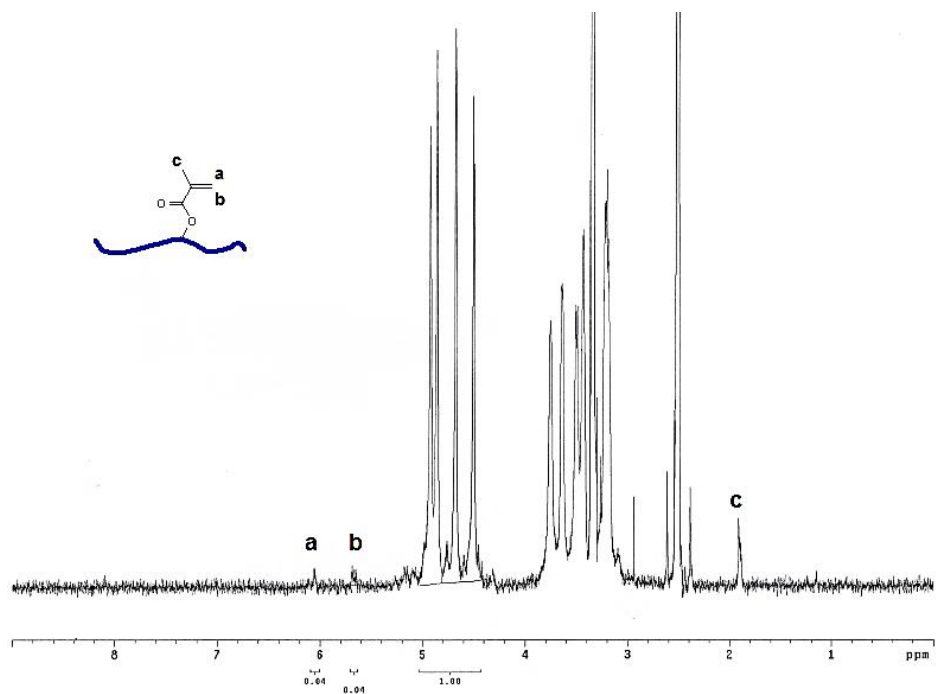

**Figure S1.** <sup>1</sup>H-NMR spectrum of GelMA. Peaks corresponding to methacrylate are noted (a to c).

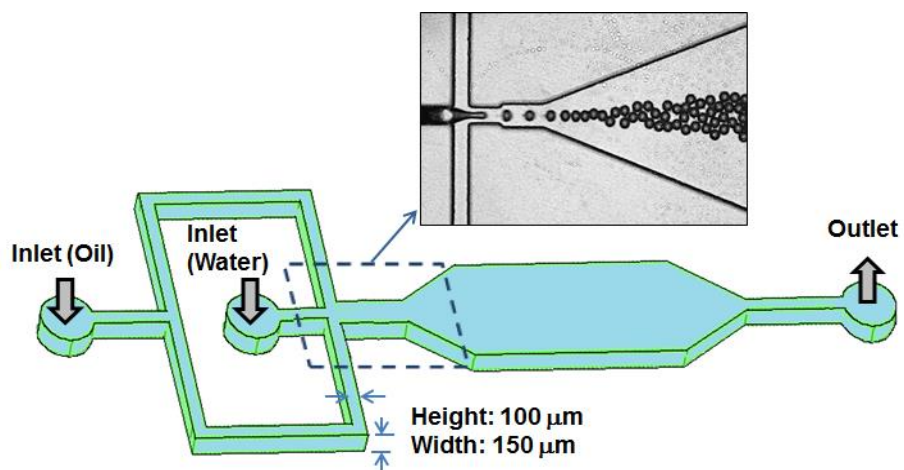

**Figure S2.** Schematics of the microfluidic flow-focusing geometry to generate droplets.

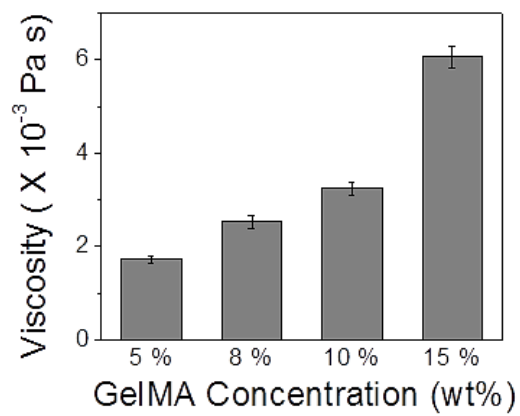

**Figure S3.** Viscosity values (in Pa s) of various concentrations of GelMA.

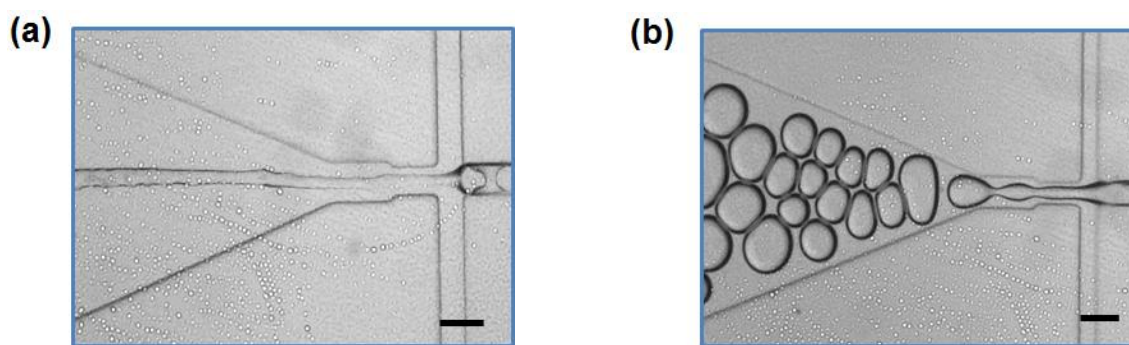

**Figure S4.** Microfluidic flow-focusing device used to generate droplets with (a) pure mineral oil or (b) mineral oil supplemented with 8 wt% Span<sup>®</sup> 80 as oil phase. (Scale bar: 200  $\mu$ m)

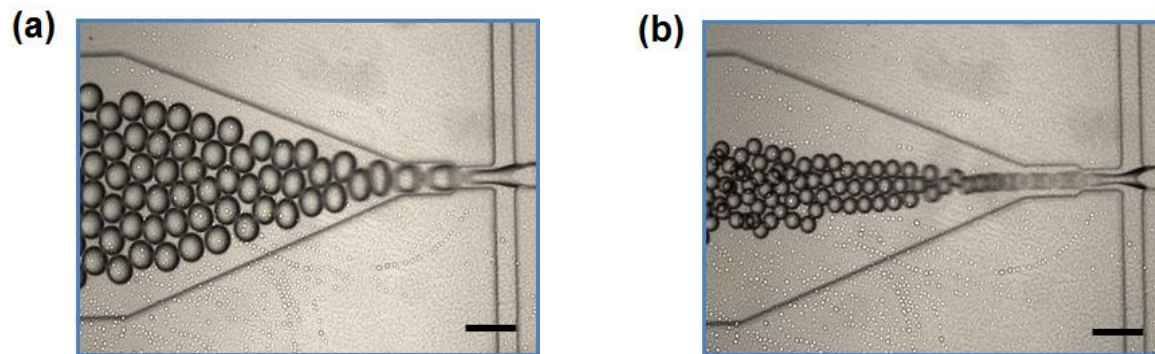

**Figure S5.** The size of GelMA microgels was controlled by changing the ratio of the flow rates of aqueous and oil flows ( $Q_{Aq}/Q_O$ ). (a)  $Q_{Aq}/Q_O = 0.3$ , (b)  $Q_{Aq}/Q_O = 0.05$ . (Scale bar: 200  $\mu\text{m}$ )

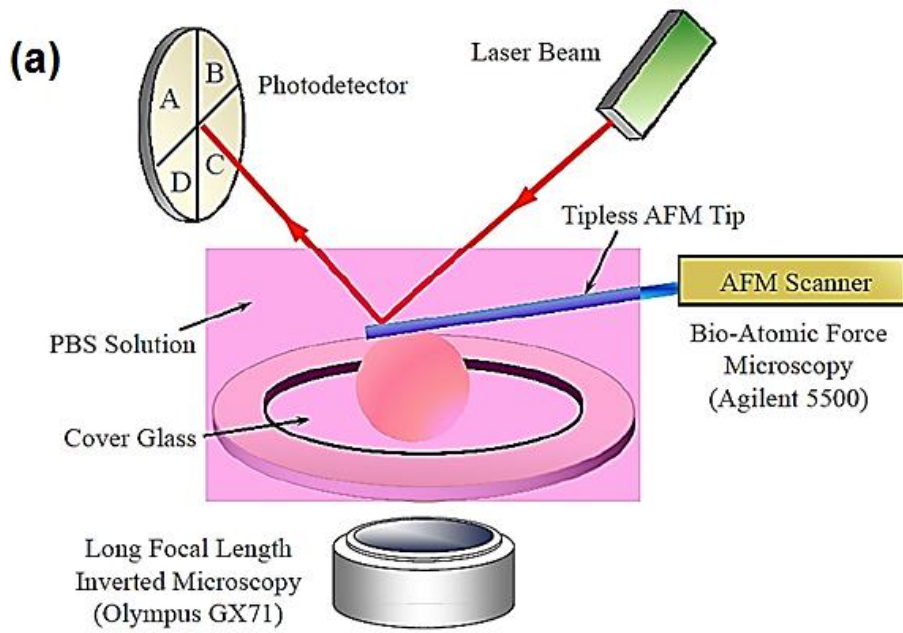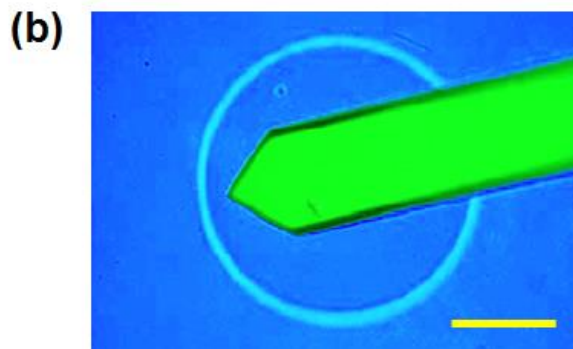

**Figure S6.** (a) Schematic description for measurement of the stiffness of GelMA microgels by the AFM-assisted nanoindentation. (b) Microscopic image of an AFM cantilever compressing the microgel. (Scale: 50  $\mu\text{m}$ )

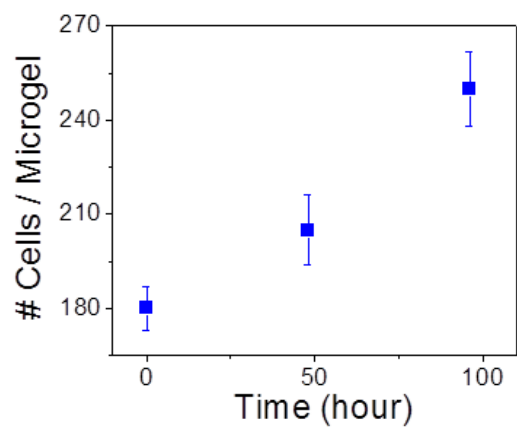

**Figure S7.** The number of CSP cells adhered to GelMA microgel measured over time.
